# Supplementary material for: Physicochemical properties of a zinc phthalocyanine – pyrene conjugate adsorbed onto single walled carbon nanotubes
Source: Royal Society of Chemistry journal article supplement (doi:10.1039/c3dt50335f), 2013-01-01
Supplement: c3dt50335f.pdf [file c3dt50335f.pdf]

## Supporting Materials

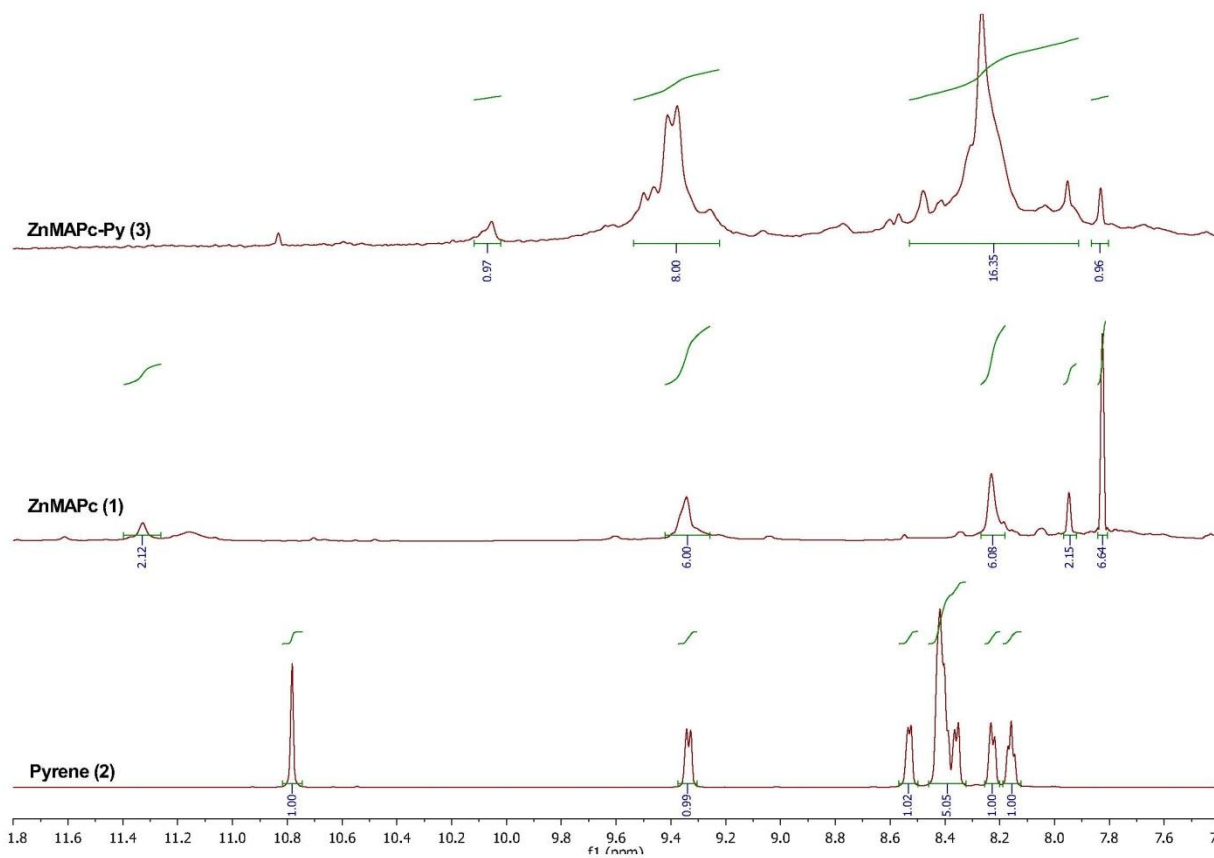

Figure 1 – <sup>1</sup>H NMR spectra of **1**, **2** and **3** in DMSO-*d*<sub>6</sub>

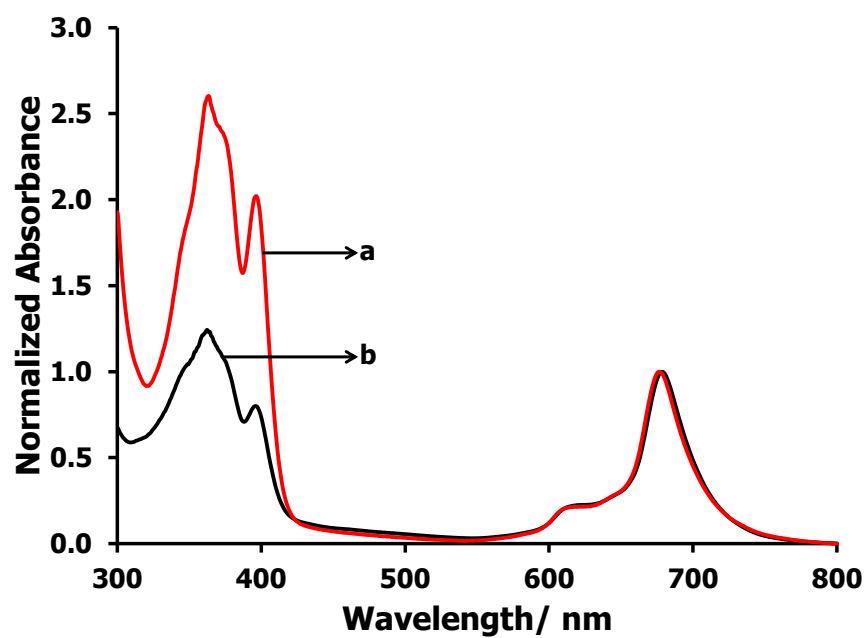

Fig. 2 UV-Vis spectra of Pc – day 1 (a) and 4 months (b) in DMSO
